# Supplementary material
Source: Springer Nature journal article supplement (https://www.springermedizin.de/resource/supplementary/12905_2012_323_MOESM2_ESM.pdf/9518498)
Supplement: MOESM2 [file 9518498]

Figure 2. Steps for study pathologists' interpretative review of test set cases

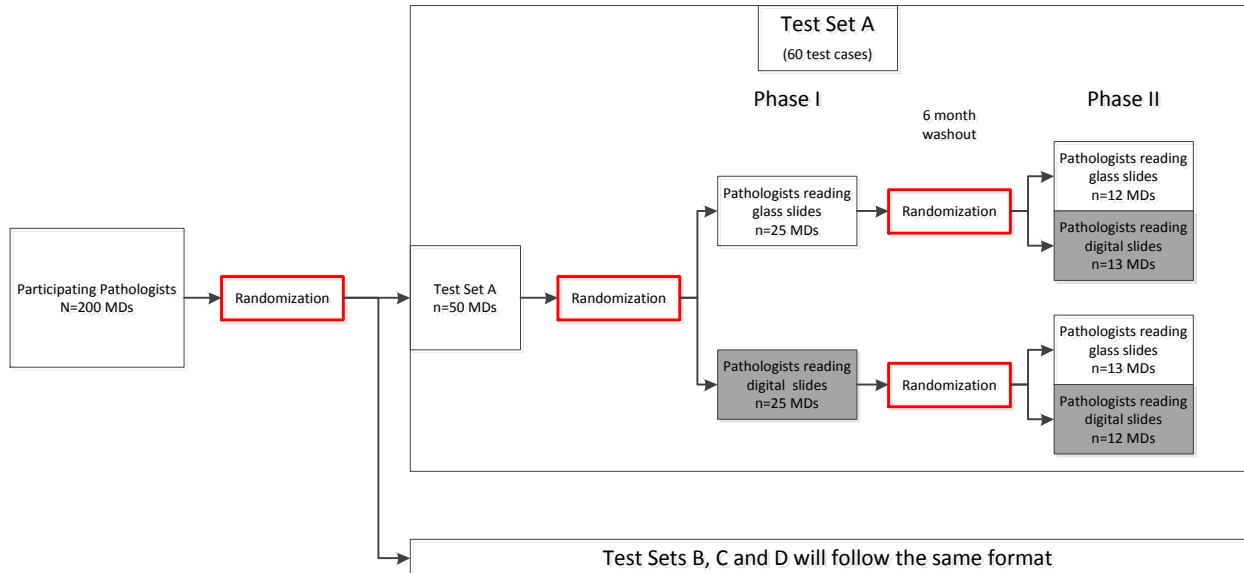

Approximately 200 study pathologists will be invited to independently review the test set cases and provide their diagnostic interpretation. Their interpretations will be compared to the gold standard diagnoses of an expert pathology panel and to the interpretations of other pathologists in the study.
